# Supplementary material
Source: PubMed Central journal article supplement (PMC6648473)
Supplement: ao8b03630_si_001.pdf [file ao8b03630_si_001.pdf]

## Supplementary Information

### Preparation and comparison of reduced graphene oxide and carbon nanotubes as fillers in conductive natural rubber for flexible electronics

Antonio Capezza<sup>a</sup>, Richard L. Andersson<sup>a\*</sup>, Valter Ström<sup>b</sup>, Qiong Wu<sup>a</sup>, Benedetta Sacchi<sup>c</sup>, Stefano Farris<sup>d</sup>, Mikael S. Hedenqvist<sup>a</sup>, Richard T. Olsson<sup>\*a</sup>

<sup>a</sup>KTH Royal Institute of Technology, School of Engineering Sciences in Chemistry, Biotechnology and Health, Fibre and Polymer Technology, SE-100 44 Stockholm, Sweden.

<sup>b</sup>KTH Royal Institute of Technology, School of Industrial Engineering and Management, Material Science and Engineering, SE-100 44 Stockholm, Sweden

<sup>c</sup>Department of Chemistry, University of Milan, via Golgi 19 – 20133 Milan, Italy

<sup>d</sup>DeFENS, Department of Food, Environmental and Nutritional Sciences—Packaging Division, University of Milan, Via Celoria 2, 20133 Milan, Italy

\*E-mail: rols@kth.se; Phone: +46 8 7909426

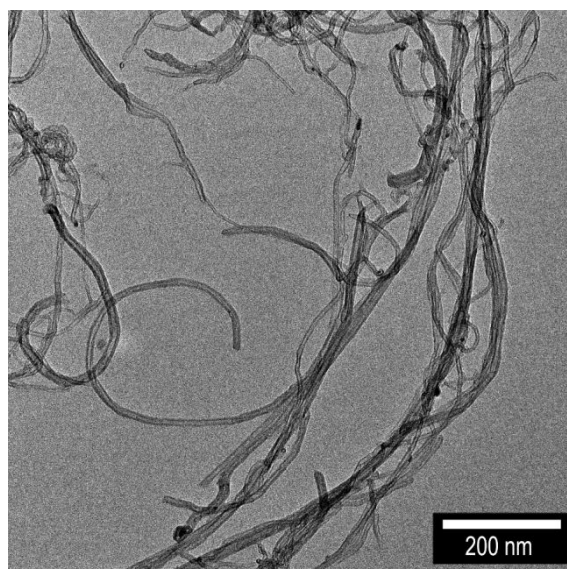

**Figure S1:** TEM of the MWCNT utilized for the preparation of the NR conductive composites.

**Table S1.** Assignment and relative percentage of the functionalities arising from the deconvolution of the C 1s XPS spectra: graphene oxide (GO1), thermally reduced at 150°C × 1 h under vacuum (GO2), thermally reduced GO at 1000°C × 5 s (GO3), chemically reduced GO using NaBH<sub>4</sub> + Ammonia (GO4), and chemically reduced GO using NaBH<sub>4</sub> + NaOH (GO5) samples determined by XPS.

| Sample | Peak BE (eV) | %     | Functionalities        |
|--------|--------------|-------|------------------------|
| GO1    | 284.5        | 48.7  | C–C and C=C            |
|        | 285.8        | 6.62  | C–OH                   |
|        | 286.7        | 37.33 | C–O–C                  |
|        | 287.7        | 7.35  | C=O                    |
| GO2    | 284.6        | 16.45 | C–C and C=C            |
|        | 286.9        | 58.45 | C–O–C                  |
|        | 288.4        | 17.9  | C=O                    |
|        | 290.4        | 7.2   | N.D.                   |
| GO3    | 284.6        | 59.65 | C–C and C=C            |
|        | 285.4        | 16.45 | C–OH                   |
|        | 286.3        | 13.7  | C–O–C                  |
|        | 288.1        | 10.2  | C=O                    |
| GO4    | 284.6        | 61.1  | C–C and C=C            |
|        | 285.5        | 17.7  | C–OH                   |
|        | 286.5        | 11.45 | C–O–C                  |
|        | 287.9        | 9.75  | C=O                    |
| GO5    | 284.6        | 58.19 | C–C (sp <sup>2</sup> ) |
|        | 285.6        | 22.09 | C–C (sp <sup>3</sup> ) |
|        | 287.0        | 12.80 | C–O                    |
|        | 288.9        | 6.91  | C=O                    |

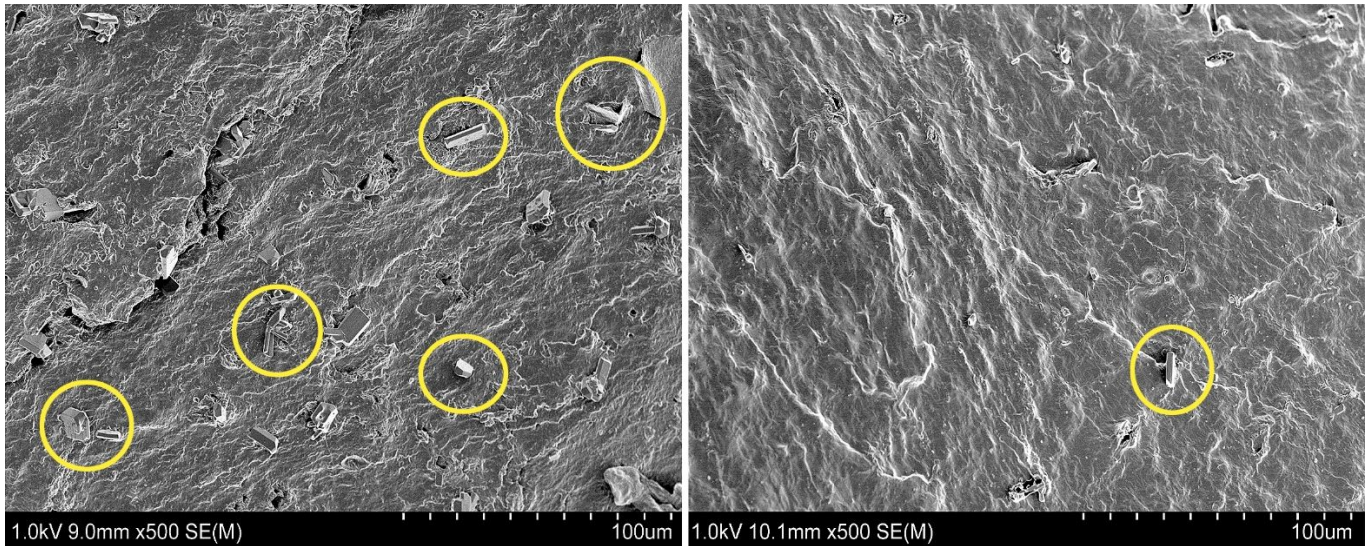

**Figure S2:** SEM cryogenic surface fracture of the rGO-THF composite (left) and rGO-Toluene (right). Contained within the yellow circles are marked the sulphur crystals remained after vulcanization of the samples

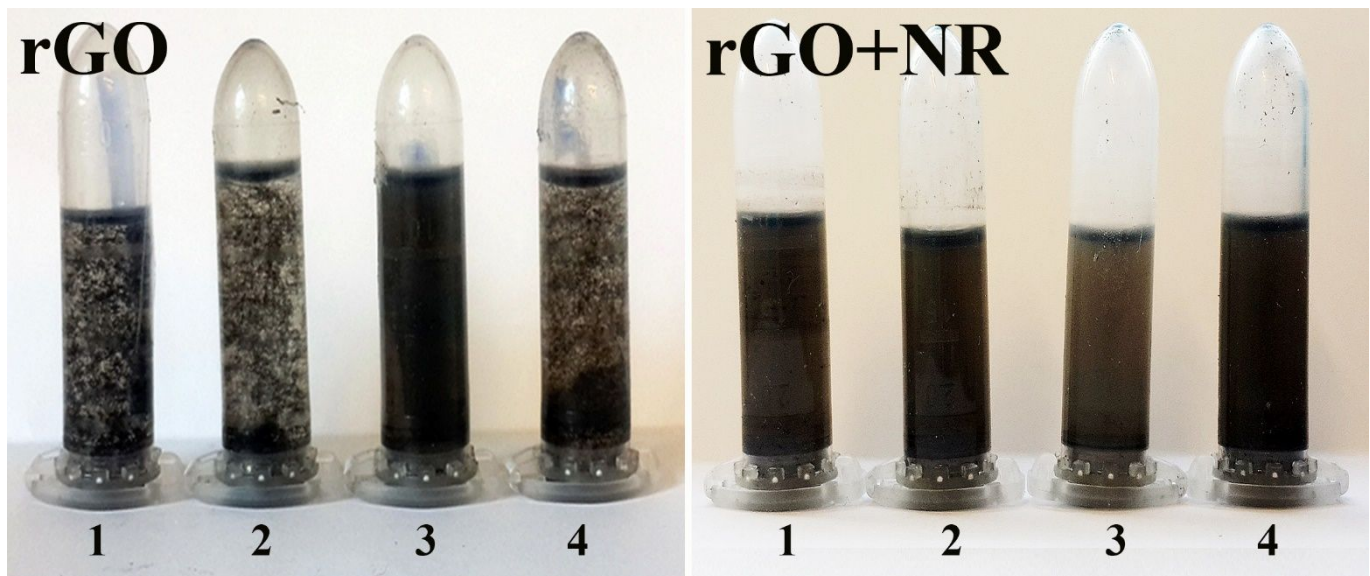

**Figure S3:** stabilizing effect observed for the rGO dispersion after the addition of 0.1 vol% of NR and 3 months in Chloroform, xylene, THF and toluene, 1-4 respectively.

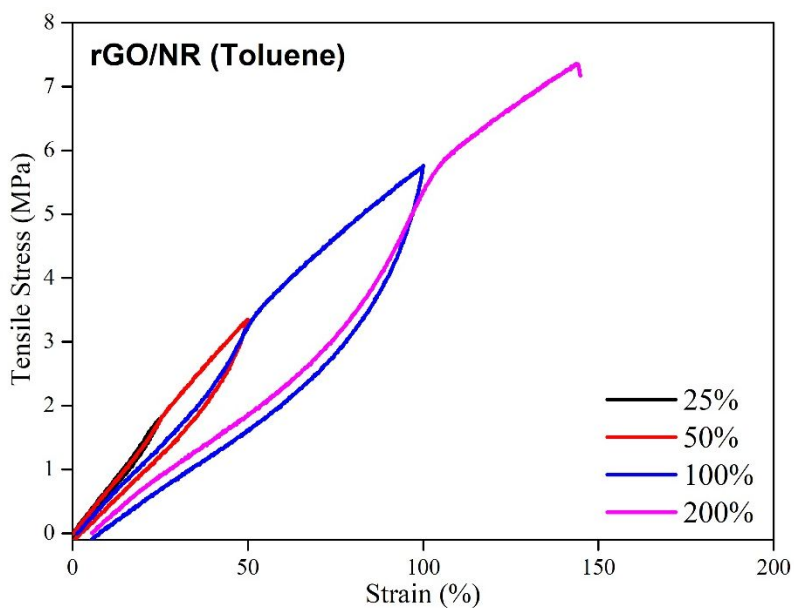

**Figure S4:** tensile test cycles for NR composite (toluene-based) with 4.4 wt% of the rGO.

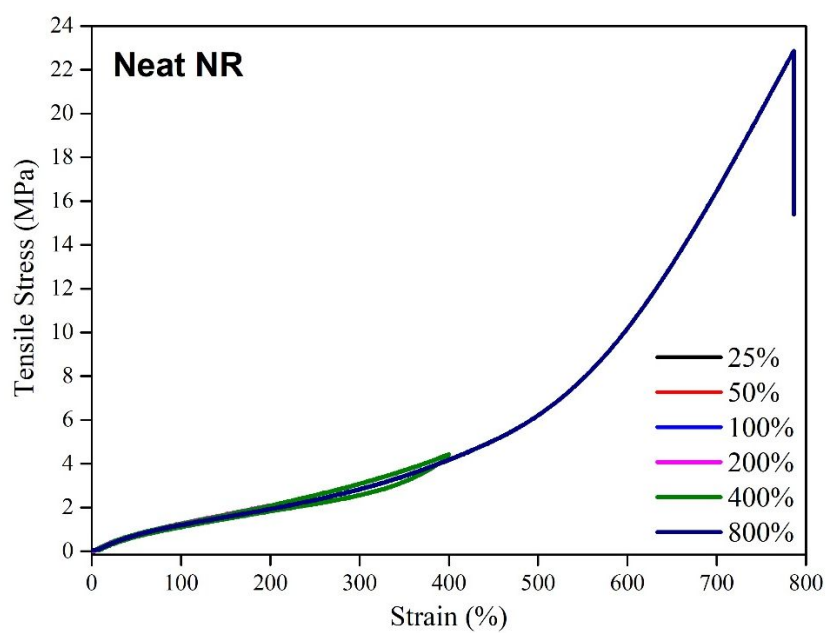

**Figure S5:** tensile test cycles for the neat NR.

### Conflicts of interest

No conflict of interest to declare
